# Supplementary material for: Mechanisms involved in xyloglucan catabolism by the cellulosome-producing bacterium Ruminiclostridium cellulolyticum
Source: PubMed Central journal article supplement (PMC4780118; doi:10.1038/srep22770), 2016-03-07

## Supplementary information

**Mechanisms involved in xyloglucan catabolism by the cellulosome-producing bacterium**

***Ruminiclostridium cellulolyticum***

Julie Ravachol<sup>1</sup>, Pascale de Philip<sup>1</sup>, Romain Borne<sup>1</sup>, Pascal Mansuelle<sup>2</sup>, María J. Maté<sup>3</sup>,

Stéphanie Perret<sup>1</sup> and Henri-Pierre Fierobe<sup>1\*</sup>

<sup>1</sup>Aix-Marseille Université-CNRS, Laboratoire de Chimie Bactérienne, UMR7283, IMM, 31 chemin Joseph Aiguier, F-13402 Marseille, France.

<sup>2</sup>Plate-forme de Protéomique, IMM, 31 chemin Joseph Aiguier, F-13402 Marseille, France.

<sup>3</sup>Aix-Marseille Université-CNRS, Laboratoire d'Architecture et Fonction des Macromolécules Biologiques, UMR7257, Parc Technologique de Luminy, F-13288 Marseille, France.

\*To whom correspondence should be sent: [hpfierob@imm.cnrs.fr](mailto:hpfierob@imm.cnrs.fr)

Supplementary Table S1: Kinetic parameters of the hydrolytic activities of Cel9U, Cel9X, Cel44O and Xgh74A on tamarind xyloglucan

| Enzyme             | $k_{cat}^a$ | $K_m^b$     | $k_{cat}/K_m^c$ |
|--------------------|-------------|-------------|-----------------|
| Cel9U <sup>d</sup> | 2,302 ± 157 | 7.5 ± 0.15  | 307             |
| Cel9X <sup>d</sup> | 6,560 ± 231 | 8.4 ± 0.4   | 781             |
| Cel44O             | 970 ± 38    | 0.21 ± 0.06 | 4,619           |
| Xgh74A             | 2,304 ± 78  | 0.37 ± 0.01 | 6,227           |

<sup>a</sup>values are given in  $\mu\text{mol}$  of products released per  $\mu\text{mol}$  of enzyme  $\times \text{min}^{-1}$ .

<sup>b</sup>values are given in  $\text{g} \times \text{L}^{-1}$  of xyloglucan.

<sup>c</sup>values are given in  $\mu\text{mol}$  of products released per  $\mu\text{mol}$  of enzyme  $\times \text{min}^{-1} \text{L} \times \text{g}^{-1}$ .

<sup>d</sup>data are from reference<sup>19</sup>.

| Supplementary Table S2: Specific activity of the $\beta$ -glucosidase GH3A on 1 mM cellooligosaccharides. |                                |
|-----------------------------------------------------------------------------------------------------------|--------------------------------|
| Substrate                                                                                                 | Specific activity <sup>a</sup> |
| Cellobiose                                                                                                | 9.0 $\pm$ 0.20 <sup>b</sup>    |
| Cellotriose                                                                                               | 12.4 $\pm$ 1.3                 |
| Cellotetraose                                                                                             | 11.6 $\pm$ 1.3                 |
| Cellopentaose                                                                                             | 14.0 $\pm$ 2.3                 |
| Cellohexaose                                                                                              | 10.7 $\pm$ 0.6                 |

<sup>a</sup>values are given in  $\mu\text{mol}$  of products released per  $\mu\text{mol}$  of enzyme  $\times \text{min}^{-1}$ .

<sup>b</sup>the data show the mean and standard deviation of two replicates.

Supplementary Table S3: MALDI-TOF analyses of the products released during the sequential degradation of XXXG by successive rounds of incubation with either the  $\alpha$ -xylosidase or the  $\beta$ -glucosidase.

| Corresponding steps in<br>Figures 9c or 9d | Composition       | Expected m/z<br>[M+Na] <sup>+</sup> | Observed m/z<br>[M+Na] <sup>+</sup> |
|--------------------------------------------|-------------------|-------------------------------------|-------------------------------------|
| Substrate                                  | XXXG <sup>a</sup> | 1,085.338                           | 1,085.306                           |
| 9c step 1 (+ $\alpha$ -xylosidase)         | GXXG              | 953.296                             | 953.322                             |
| 9c step 2 (+ $\beta$ -glucosidase)         | XXG               | 791.243                             | 791.237                             |
| 9c step 3 (+ $\alpha$ -xylosidase)         | GXG               | 659.201                             | 659.137                             |
| 9c step 4 (+ $\beta$ -glucosidase)         | XG                | 497.148                             | 497.131                             |
| Substrate                                  | XXXG              | 1,085.338                           | 1,085.306                           |
| 9d step 1 (+ $\beta$ -glucosidase)         | XXXG              | 1,085.338                           | 1,085.290                           |
| 9d step 2 (+ $\alpha$ -xylosidase)         | GXXG              | 953.296                             | 953.209                             |
| 9d step 3 (+ $\beta$ -glucosidase)         | XXG               | 791.243                             | 791.198                             |
| 9d step 4 (+ $\alpha$ -xylosidase)         | GXG               | 659.201                             | 659.139                             |
| 9d step 5 (+ $\beta$ -glucosidase)         | XG                | 497.148                             | 497.081                             |

<sup>a</sup>see Fig. 1 for xyloglucan motif abbreviations.

Supplementary Table S4: list of primers used

| <b>Primers used for overexpression in <i>E. coli</i> of selected genes</b> |                    |                                                     |
|----------------------------------------------------------------------------|--------------------|-----------------------------------------------------|
| <b>Protein (gene locus)</b>                                                | <b>Primer name</b> | <b>5'-3' primer sequence</b>                        |
| <b>Cel44O (Ccel_0429)</b>                                                  | 44Of               | AAAAAACCATGGCTGCCAGTGACGCAATAAACG                   |
|                                                                            | 44Or               | AAAAAACTCGAGCCAATCAATTGAATCAACATACATT               |
| <b>Xgh74A (Ccel_1207)</b>                                                  | Ccel_1207f         | TTTTTCCATGGCAAATGGCCCCGTAAGCGCCCCGTATAATTGGAA       |
|                                                                            | Ccel_1207r         | GGGGGGCTCGAGAAATGAGGTAATTATTTCCCAATAAATAAC          |
| <b>Gal42A (Ccel_2451)</b>                                                  | 2451ncof           | TTTTTCCATGGATAAATATATGCCTATTGGTATG                  |
|                                                                            | 2451mnf            | CTAAAGGATTTCACGGCGGACGTC                            |
|                                                                            | 2451mnr            | GACGTCCGCCG TGGAAATCCTTTAG                          |
|                                                                            | 2451xhor           | TTTTTCTCGAGTATTTTAGCTTTTAGCACTTTTACGTCA             |
| <b>Glu3A (Ccel_2454)</b>                                                   | 2454Ncof           | AAAAACCATGGAATACGATCAGATAGATAAAAAAATTGATGAAC        |
|                                                                            | 2454Xhor           | AAAAAACTCGAGCAGCAAGAGCTATAGCTATCG                   |
| <b>Xyl31A (Ccel_2455)</b>                                                  | 2455ncof           | TATATACCATGGCTAAATTTCTAAATGGATACTGGATGAGT           |
|                                                                            | 2455xhor           | TTTTTCTCGAGTAGAATTCTTACTGTATAACTGCCAGTAGA           |
| <b>SBP<sub>2458</sub> (Ccel_2458)</b>                                      | SBPf               | AATTCATATGCACCACCACCACCACGCTTGTACCAACCGGGAACCGACAGC |
|                                                                            | SBPrev             | AATTCCTCGAGTTATTTACTGTTTTCTGCAGCCTGCTTGCGGG         |
| <b>Cel9Xt</b>                                                              | XdokeTf            | GCATTCGCCAACAGTAATTTGTCAGGTACTCTTCTACTAAATTATACGGC  |
|                                                                            | XdokeTR            | GCCGTATAATTTAGTAGAAGGAGTACCTGACAAATTACTGTTGGCGAATGC |
|                                                                            | X830f              | CCCCCAGTTCAAGATAGGA                                 |
| <b>9X-44O</b>                                                              | 9X44Of             | CAGTAATTTGTCAGGTGAAAACTCCATAGCTGCCAGTGACGCAATAAACG  |
|                                                                            | 9X44Or             | CGTTTATGCGTCACITGGCAGCTATGGAGTTTTTCACCTGACAAATTACTG |
|                                                                            | pETrev             | ATGTTTGACAGCTTATCATCGA                              |

| <b>Primers used for qPCR experiments designed with the Primer-BLAST tool</b> |                    |                              |
|------------------------------------------------------------------------------|--------------------|------------------------------|
| <b>Protein (gene locus)</b>                                                  | <b>Primer name</b> | <b>5'-3' primer sequence</b> |
| <b>Gal42A (Ccel_2451)</b>                                                    | 2451f              | CTCGTGGATGTCGCAAAAGT         |
|                                                                              | 2451r              | CACCACTCATGGTTAAGCCG         |
| <b>Regulator (Ccel_2452)</b>                                                 | 2452f              | CGGCAAGCTCGGTAATCTT          |
|                                                                              | 2452r              | CGTCCCACAGAAGCAAACAA         |
| <b>Sensor (Ccel_2453)</b>                                                    | 2453f              | CAGCACCATGTGGGATAACG         |
|                                                                              | 2453r              | CGTATACGGCGTACCAAAGC         |
| <b>Glu3A (Ccel_2454)</b>                                                     | 2454f              | TGCTGCCAATAACCAGGAGA         |
|                                                                              | 2454r              | TCCGTAATCAACTGACGGCT         |
| <b>Xyl31A (Ccel_2455)</b>                                                    | 2455f              | TACGGTTTGGGAGAGCGATT         |
|                                                                              | 2455r              | TCCAACGATTCGCCTTCAAC         |
| <b>TMD<sub>2456</sub> (Ccel_2456)</b>                                        | 2456f              | GAAGTCAAGCGTGGTTGGTT         |
|                                                                              | 2456r              | CCACAAACTCCAAAGCGTCA         |
| <b>TMD<sub>2457</sub> (Ccel_2457)</b>                                        | 2457f              | TGCTTAATCTGGGGCTTCGT         |
|                                                                              | 2457r              | CAAGAATGGGAACGCAGAGG         |
| <b>SBP<sub>2458</sub> (Ccel_2458)</b>                                        | 2458f              | TGGCAAAGCACGGAGATAAC         |
|                                                                              | 2458r              | CCTCGGAAGGAGTAATGGGA         |
| <b>Cel44O (Ccel_0429)</b>                                                    | 0429f              | AGCACCGTCAGAAAGATGGA         |
|                                                                              | 0429r              | AGAGAGCCGGTTCATTGTCA         |
| <b>Cel9U (Ccel_0755)</b>                                                     | 0755f              | CGGTAAAGACGGAGGGAAGT         |
|                                                                              | 0755r              | ATTGTAATCCCCGGCATCGT         |
| <b>Xgh74A (Ccel_1207)</b>                                                    | 1207f              | GAAGCGGTAACGGACTTTGG         |
|                                                                              | 1207r              | GGTTCCATGTTTCTCCTGC          |
| <b>Cel9X (Ccel_2621)</b>                                                     | 2621f              | TACTGAGTGGCAGCACGTAA         |
|                                                                              | 2621r              | AGCCGGATATGCTTTTCCT          |
| <b>RpoD (Ccel_0541)</b>                                                      | RpoDdir            | AAACATAGTCAAGAAAGTAGAAAAG    |
|                                                                              | RpoDrev            | CTATACTAAACAACCAGCCTTAAG     |
| <b>16S rRNA (Ccel_R0018)</b>                                                 | 16s235F            | CTATGTTTCTTGAGTGCCGG         |
|                                                                              | 16s235R            | ATACTTATTGTGTTAACTCCGG       |

**Primers used for construction of *R. cellulolyticum* mutant strain MTL2458**

| Protein<br>(gene locus)                              | Primer name | 5'-3' primer sequence                                        |
|------------------------------------------------------|-------------|--------------------------------------------------------------|
|                                                      | IBS-SBP     | AAAAAAGCTTATAATTATCCTTACATGCCGCGTCGTGCGCCCAGATAGGGTG         |
|                                                      | EBS1d-SBP   | CAGATTGTACAAATGTGGTGATAACAGATAAGTCGCCGTCCCTAACTTACCTTTCTTTGT |
|                                                      | EBS2-SBP    | TGAACGCAAGTTTCTAATTTTCGGTTGCATGTCGATAGAGGAAAGTGCT            |
|                                                      | EBS         | CGAAATTAGAACTTGCCTCAGTAAAC                                   |
| <b>SBP<sub>2458</sub></b><br>(CceI <sub>2458</sub> ) | SBPf        | GGGTGGATTTATTCAGTGTGGA                                       |
|                                                      | SBPr        | GGTGGCAAGAGCGACGGTATGGTG                                     |
| <b>Em<sup>R</sup></b>                                | ramF        | ACGCGTTATATTGATAAAAATAATAATAGTGGG                            |
|                                                      | ramR        | ACGCGTGCGACTCATAGAATTATTTCTCCCG                              |

**Supplementary Figure S1: Growth on minimal medium supplemented with a) tamarind xyloglucan or b) XGO<sub>4</sub> at 3.5 g/L.**

The data show the mean of three independent experiments and the bars represent the standard deviation. Cultures on minimal medium supplemented with tamarind xyloglucan (**a**) or XGO<sub>4</sub> (**b**) were used as inoculum (1/20).

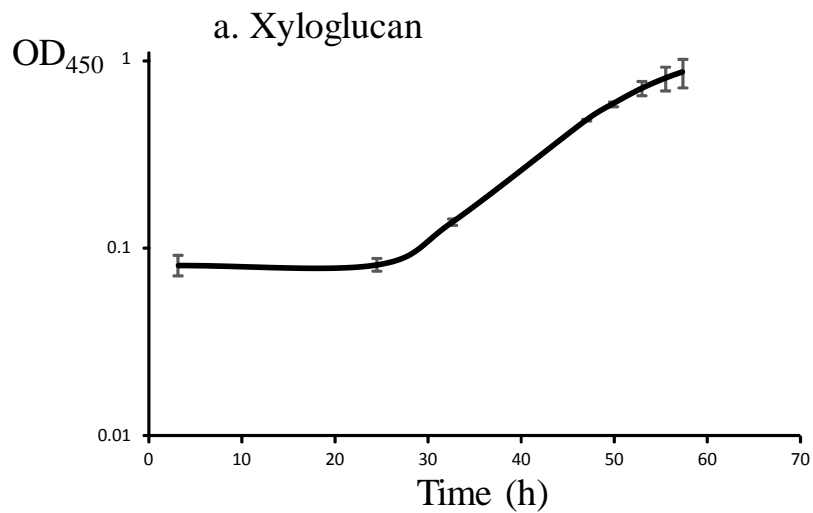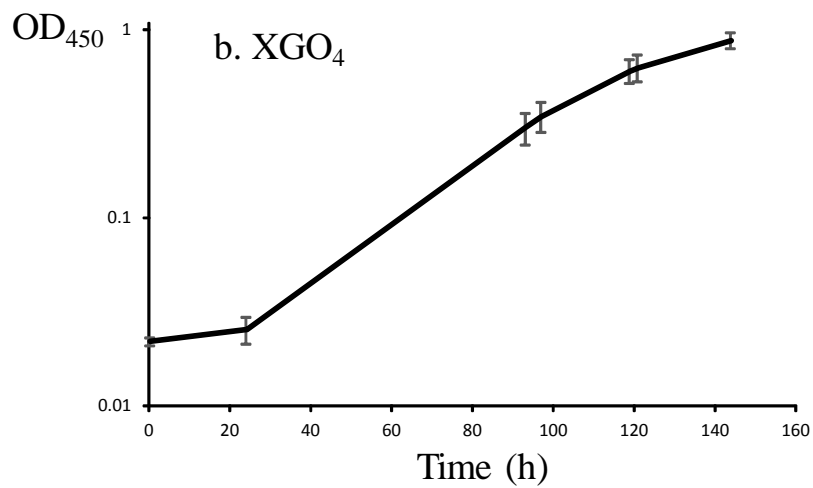

**Supplementary Figure S2: Complete degradation of 3.5 g/L xyloglucan by Cel9X.**

Xyloglucan was incubated for 24 h at 37°C with no (blue) or 0.5  $\mu$ M of Cel9X (red). The obtained sugars are indicated on top of each peak. The mixture of XGO<sub>4</sub> oligosaccharides served to prepare the XGO<sub>4</sub>-based minimal medium used for growth of *R. cellulolyticum* (Figure S1) and mRNA extraction subsequently used for reverse transcription and quantitative PCR experiments (Figure 7).

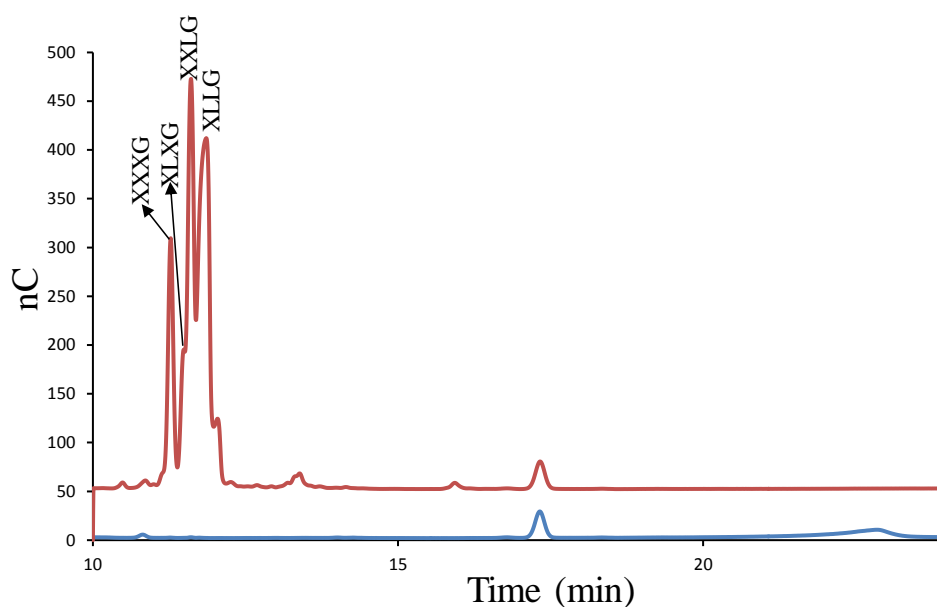



**Supplementary Figure S3: Changes in relative xyloglucan viscosity versus reducing sugars released by Cel9X, Cel44O and Xgh74A.**

Green line, Cel9X; blue line, Cel44O; red line, Xgh74A. The data show the mean and standard deviation of three independent experiments. The specific viscosity was determined as  $((T - T_0)/T_0)$  where T and  $T_0$  correspond to the flow time of xyloglucan with enzyme and the flow time of buffer, respectively.

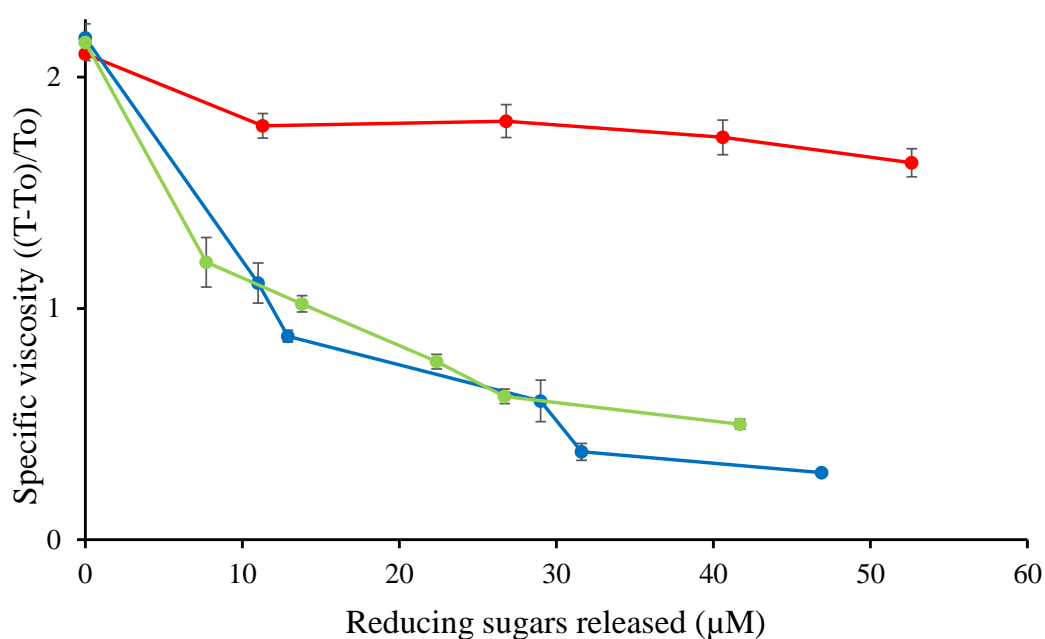

**Supplementary Figure S4: HPAEC-PAD analysis of the action of the  $\beta$ -glucosidase Glu3A on the end products generated by a) Cel44O and b) Cel9X on xyloglucan.**

Xyloglucan (3.5 g/L) was incubated for 24 h at 37°C with 0.5  $\mu$ M of Cel44O (**a**) or 0.5  $\mu$ M of Cel9X (**b**), prior heating at 100 °C for 5 min. The xyloglucan oligosaccharides obtained in each case (black lines, **a** and **b**) were then incubated with 1  $\mu$ M of Glu3A for 30 min (red lines, **a** and **b**) or 2 h (blue lines, **a** and **b**). The obtained sugars are indicated on top of each peak.

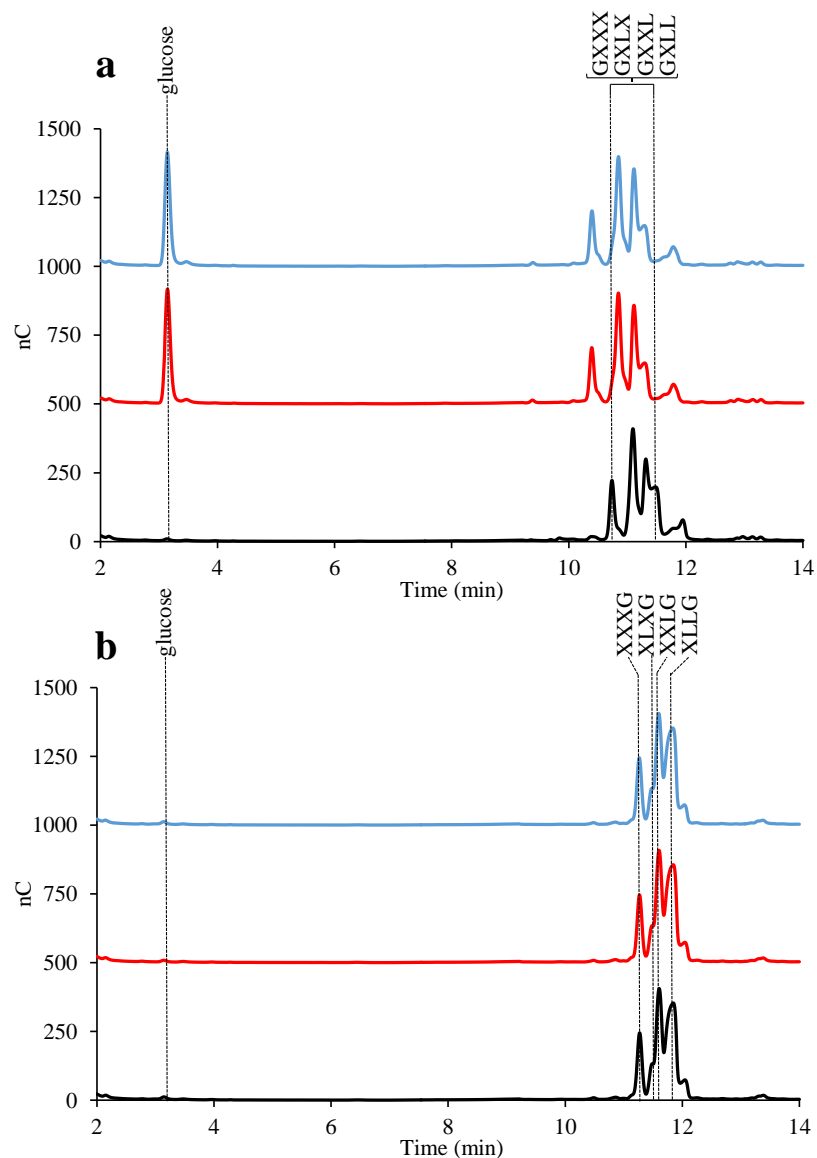

**Figure S5: Lack of interaction between the SBP<sub>2458</sub> and isoprimeverose observed by ITC.**

The upper part of each panel shows the raw binding heats and the lower part shows the integrated binding heats minus the dilution control heats. The SBP was at 40  $\mu$ M and the ligand at 4 mM. Similar ITC data were obtained for cellotriose, cellotetraose, glucose, xylose and galactose.

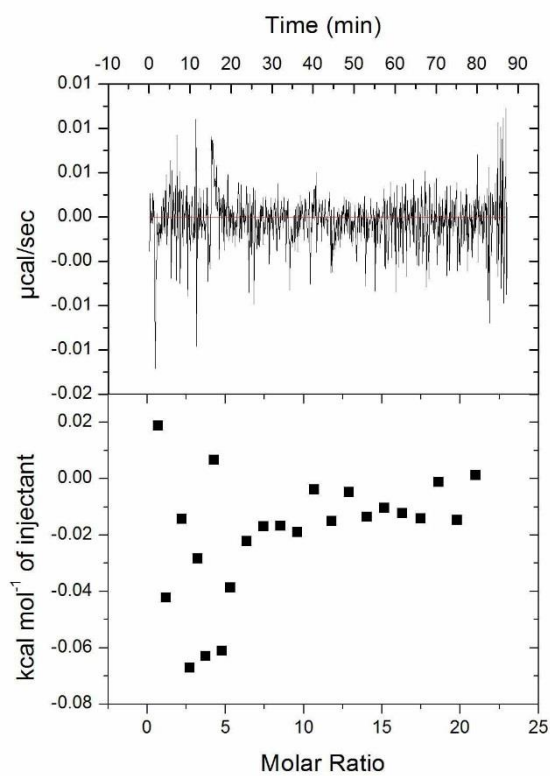

**Figure S6: Growth of wild-type and mutant MTL2458 strains of *R. cellulolyticum* on minimal medium supplemented with a) cellobiose (2 g/L) or b) tamarind xyloglucan (3.5 g/L).**

The cultures were inoculated (1/33) with cellobiose (2 g/L) grown precultures. The data show the mean of three independent experiments for wild type (black squares) and MTL2458 (open squares) strains, respectively. Bars represent the standard deviations.

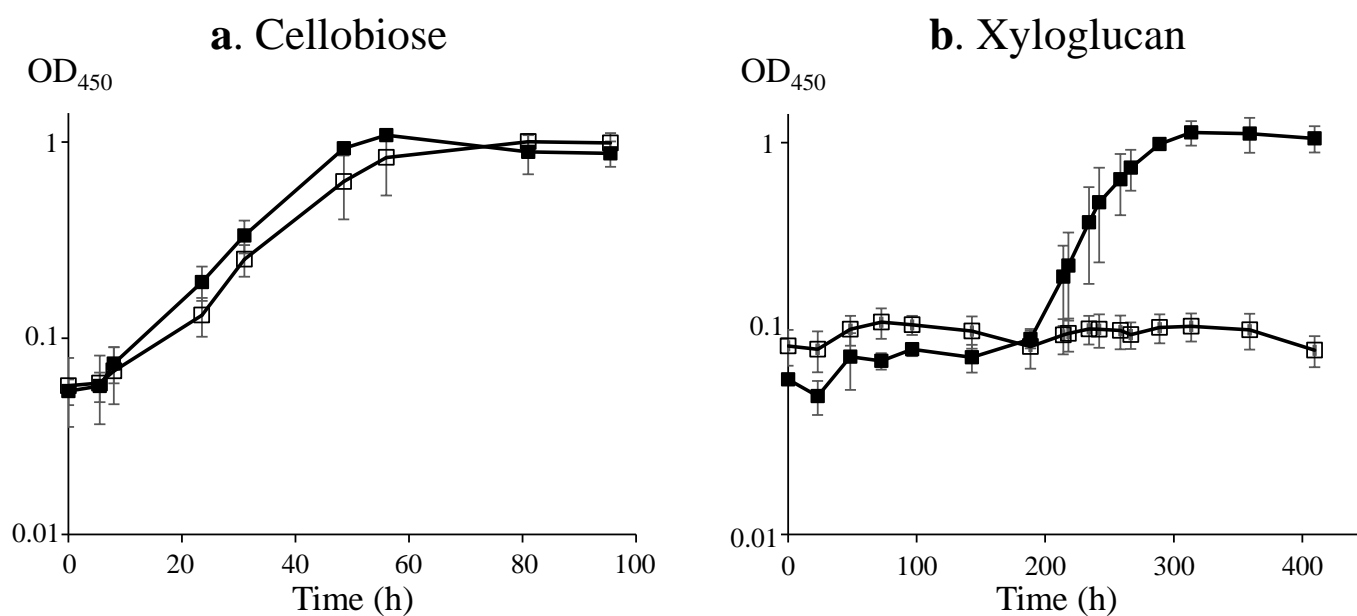

Supplement: srep22770-s1.pdf [file srep22770-s1.pdf]
